# Supplementary material
Source: publisher figshare collection journal article supplement (https://karger.figshare.com/ndownloader/files/27799902)
Supplement: Supplementary file 1 [file 27799902]

# Primary Teams Balancing Measure

## Section 1

Provider Role

- ☐ Physician
  - ☐ Advanced Practice Provider
  - ☐ Nurse/Care Coordinator
  - ☐ Physical Therapist
  - ☐ Social Worker
  - ☐ Pharmacist
  - ☐ Scheduler/Front Desk
  - ☐ Medical Assistant
  - ☐ Prefer not to identify
  - ☐ Other (fill in below)
- (Although individual responses will not be tracked, if you are concerned about your anonymity please use the "prefer not to identify")

What is your clinical role?

---

**Section 2**

Has Assignment of primary teams significantly improved communication between patients and providers?

- ☐ Significant worsening of communication
- ☐ Mild/Moderate worsening of communication
- ☐ Neutral, No change
- ☐ Mild/Moderate improvement in communication
- ☐ Significant improvement in communication

Has Assignment of primary teams significantly improved coordination of care for patients??

- ☐ Significant worsening of coordination
- ☐ Mild/Moderate worsening of coordination
- ☐ Neutral, No change
- ☐ Mild/Moderate improvement in coordination
- ☐ Significant improvement in coordination

Has Primary Teams created more or less clinical "work" for you?

- ☐ Significant worsening of time spent on clinical work
- ☐ Mild/Moderate worsening of time spent on clinical work
- ☐ Neutral, No change
- ☐ Mild/Moderate improvement in time spent on clinical work
- ☐ Significant improvement in time spent on clinical work

What is your overall impression of the creation and assigning of primary teams?

- ☐ Not at all satisfied with primary teams
- ☐ Somewhat satisfied with primary teams
- ☐ Neutral
- ☐ Somewhat satisfied with primary teams
- ☐ Very satisfied with primary teams

Additional Comments? Ways to improve primary teams?

---
